# Supplementary material
Source: PubMed Central journal article supplement (PMC6125960)
Supplement: JCB700666_supplementary_material.pdf [file JCB700666_supplementary_material.pdf]

Supplementary Table 1: List of Abbreviations

|                  |                                                                          |
|------------------|--------------------------------------------------------------------------|
| AIS              | Acute ischemic stroke                                                    |
| ASPECTS          | Alberta Stroke Program Early CT Score                                    |
| CBF              | Cerebral blood flow                                                      |
| CDE              | Common Data Elements                                                     |
| CDM              | Clinical-DWI mismatch                                                    |
| CT               | Computerized tomography                                                  |
| DEFUSE           | Diffusion Weighted Imaging Evaluation for Understanding Stroke Evolution |
| DWI              | Diffusion weighted MR imaging                                            |
| DWI <sub>v</sub> | DWI lesion volume                                                        |
| EVT              | Endovascular treatment                                                   |
| FIM              | Functional independence measure                                          |
| FIV              | Final infarct volume                                                     |
| IV               | Intravenous                                                              |
| LVO              | Large-vessel occlusion                                                   |
| MoCA             | Montreal Cognitive Assessment                                            |
| mRS              | Modified Rankin scale                                                    |
| MRI              | Magnetic resonance imaging                                               |
| MTT              | Mean transit time                                                        |
| NIHSS            | National Institutes of Health Stroke Scale                               |
| NINDS            | National Institutes of Neurological Disorders and Stroke                 |
| PDM              | Perfusion-diffusion mismatch                                             |
| PROMIS           | Patient-Reported Outcomes Measurement Information System                 |
| PWI              | Perfusion weighted MR imaging                                            |
| PWI <sub>v</sub> | PWI lesion volume                                                        |
| STG              | Superior temporal gyrus                                                  |
| Tmax             | Time-to-maximum value of the deconvolved residue function                |
| tPA              | Tissue plasminogen activator                                             |
| VLSM             | Voxel-based lesion-symptom mapping                                       |
